# Supplementary material for: High-throughput and quantitative genome-wide messenger RNA sequencing for molecular phenotyping
Source: PubMed Central journal article supplement (PMC4524448; doi:10.1186/s12864-015-1788-6), 2015-08-05
Supplement: 12864_2015_1788_MOESM5_ESM.pdf [file 12864_2015_1788_MOESM5_ESM.pdf]

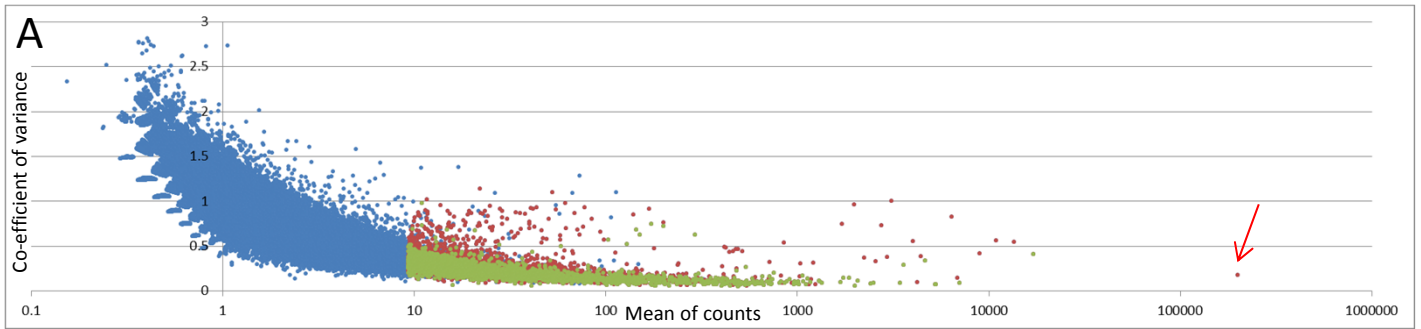

| B  | 1     | 2     | 3     | 4     | 5     | 6     | 7     | 8     | 9     | 10    | 11    | 12    |
|----|-------|-------|-------|-------|-------|-------|-------|-------|-------|-------|-------|-------|
| 1  | 1.000 | 0.999 | 0.996 | 0.985 | 0.997 | 0.998 | 0.999 | 1.000 | 0.999 | 1.000 | 0.987 | 0.988 |
| 2  | 0.999 | 1.000 | 0.996 | 0.988 | 0.998 | 0.999 | 0.999 | 0.999 | 1.000 | 1.000 | 0.988 | 0.987 |
| 3  | 0.996 | 0.996 | 1.000 | 0.993 | 0.998 | 0.997 | 0.996 | 0.997 | 0.995 | 0.995 | 0.993 | 0.993 |
| 4  | 0.985 | 0.988 | 0.993 | 1.000 | 0.992 | 0.990 | 0.987 | 0.989 | 0.987 | 0.986 | 0.996 | 0.989 |
| 5  | 0.997 | 0.998 | 0.998 | 0.992 | 1.000 | 0.999 | 0.996 | 0.999 | 0.997 | 0.997 | 0.994 | 0.995 |
| 6  | 0.998 | 0.999 | 0.997 | 0.990 | 0.999 | 1.000 | 0.998 | 0.999 | 0.999 | 0.999 | 0.991 | 0.990 |
| 7  | 0.999 | 0.999 | 0.996 | 0.987 | 0.996 | 0.998 | 1.000 | 0.999 | 0.999 | 0.999 | 0.987 | 0.986 |
| 8  | 1.000 | 0.999 | 0.997 | 0.989 | 0.999 | 0.999 | 0.999 | 1.000 | 0.999 | 0.999 | 0.990 | 0.991 |
| 9  | 0.999 | 1.000 | 0.995 | 0.987 | 0.997 | 0.999 | 0.999 | 0.999 | 1.000 | 1.000 | 0.985 | 0.985 |
| 10 | 1.000 | 1.000 | 0.995 | 0.986 | 0.997 | 0.999 | 0.999 | 0.999 | 1.000 | 1.000 | 0.987 | 0.987 |
| 11 | 0.987 | 0.988 | 0.993 | 0.996 | 0.994 | 0.991 | 0.987 | 0.990 | 0.985 | 0.987 | 1.000 | 0.995 |
| 12 | 0.988 | 0.987 | 0.993 | 0.989 | 0.995 | 0.990 | 0.986 | 0.991 | 0.985 | 0.987 | 0.995 | 1.000 |

| C  | 1     | 2     | 3     | 4     | 5     | 6     | 7     | 8     | 9     | 10    | 11    | 12    |
|----|-------|-------|-------|-------|-------|-------|-------|-------|-------|-------|-------|-------|
| 1  | 1.000 | 0.999 | 0.996 | 0.985 | 0.997 | 0.998 | 0.999 | 1.000 | 0.999 | 1.000 | 0.987 | 0.988 |
| 2  | 0.999 | 1.000 | 0.996 | 0.988 | 0.998 | 0.999 | 0.999 | 0.999 | 1.000 | 1.000 | 0.988 | 0.987 |
| 3  | 0.996 | 0.996 | 1.000 | 0.993 | 0.998 | 0.997 | 0.996 | 0.997 | 0.995 | 0.995 | 0.993 | 0.993 |
| 4  | 0.985 | 0.988 | 0.993 | 1.000 | 0.992 | 0.991 | 0.987 | 0.989 | 0.987 | 0.986 | 0.996 | 0.989 |
| 5  | 0.997 | 0.998 | 0.998 | 0.992 | 1.000 | 0.999 | 0.996 | 0.999 | 0.997 | 0.997 | 0.994 | 0.995 |
| 6  | 0.998 | 0.999 | 0.997 | 0.991 | 0.999 | 1.000 | 0.998 | 0.999 | 0.999 | 0.999 | 0.991 | 0.991 |
| 7  | 0.999 | 0.999 | 0.996 | 0.987 | 0.996 | 0.998 | 1.000 | 0.999 | 0.999 | 0.999 | 0.987 | 0.986 |
| 8  | 1.000 | 0.999 | 0.997 | 0.989 | 0.999 | 0.999 | 0.999 | 1.000 | 0.999 | 0.999 | 0.990 | 0.991 |
| 9  | 0.999 | 1.000 | 0.995 | 0.987 | 0.997 | 0.999 | 0.999 | 0.999 | 1.000 | 1.000 | 0.985 | 0.985 |
| 10 | 1.000 | 1.000 | 0.995 | 0.986 | 0.997 | 0.999 | 0.999 | 0.999 | 1.000 | 1.000 | 0.987 | 0.987 |
| 11 | 0.987 | 0.988 | 0.993 | 0.996 | 0.994 | 0.991 | 0.987 | 0.990 | 0.985 | 0.987 | 1.000 | 0.995 |
| 12 | 0.988 | 0.987 | 0.993 | 0.989 | 0.995 | 0.991 | 0.986 | 0.991 | 0.985 | 0.987 | 0.995 | 1.000 |

| D  | 1     | 2     | 3     | 4     | 5     | 6     | 7     | 8     | 9     | 10    | 11    | 12    |
|----|-------|-------|-------|-------|-------|-------|-------|-------|-------|-------|-------|-------|
| 1  | 1.000 | 0.942 | 0.934 | 0.859 | 0.899 | 0.924 | 0.978 | 0.987 | 0.936 | 0.973 | 0.862 | 0.852 |
| 2  | 0.942 | 1.000 | 0.942 | 0.957 | 0.933 | 0.973 | 0.942 | 0.967 | 0.986 | 0.969 | 0.888 | 0.833 |
| 3  | 0.934 | 0.942 | 1.000 | 0.911 | 0.946 | 0.951 | 0.903 | 0.961 | 0.908 | 0.930 | 0.900 | 0.883 |
| 4  | 0.859 | 0.957 | 0.911 | 1.000 | 0.936 | 0.952 | 0.850 | 0.904 | 0.909 | 0.887 | 0.945 | 0.835 |
| 5  | 0.899 | 0.933 | 0.946 | 0.936 | 1.000 | 0.973 | 0.844 | 0.945 | 0.873 | 0.904 | 0.960 | 0.957 |
| 6  | 0.924 | 0.973 | 0.951 | 0.952 | 0.973 | 1.000 | 0.896 | 0.963 | 0.936 | 0.954 | 0.937 | 0.884 |
| 7  | 0.978 | 0.942 | 0.903 | 0.850 | 0.844 | 0.896 | 1.000 | 0.966 | 0.958 | 0.976 | 0.809 | 0.767 |
| 8  | 0.987 | 0.967 | 0.961 | 0.904 | 0.945 | 0.963 | 0.966 | 1.000 | 0.949 | 0.983 | 0.901 | 0.887 |
| 9  | 0.936 | 0.986 | 0.908 | 0.909 | 0.873 | 0.936 | 0.958 | 0.949 | 1.000 | 0.969 | 0.812 | 0.765 |
| 10 | 0.973 | 0.969 | 0.930 | 0.887 | 0.904 | 0.954 | 0.976 | 0.983 | 0.969 | 1.000 | 0.851 | 0.810 |
| 11 | 0.862 | 0.888 | 0.900 | 0.945 | 0.960 | 0.937 | 0.809 | 0.901 | 0.812 | 0.851 | 1.000 | 0.918 |
| 12 | 0.852 | 0.833 | 0.883 | 0.835 | 0.957 | 0.884 | 0.767 | 0.887 | 0.765 | 0.810 | 0.918 | 1.000 |

| E  | 1     | 2     | 3     | 4     | 5     | 6     | 7     | 8     | 9     | 10    | 11    | 12    |
|----|-------|-------|-------|-------|-------|-------|-------|-------|-------|-------|-------|-------|
| 1  | 1.000 | 0.941 | 0.933 | 0.858 | 0.899 | 0.923 | 0.978 | 0.987 | 0.934 | 0.972 | 0.862 | 0.852 |
| 2  | 0.941 | 1.000 | 0.941 | 0.957 | 0.932 | 0.973 | 0.942 | 0.967 | 0.986 | 0.969 | 0.887 | 0.832 |
| 3  | 0.933 | 0.941 | 1.000 | 0.910 | 0.946 | 0.951 | 0.900 | 0.960 | 0.906 | 0.929 | 0.900 | 0.882 |
| 4  | 0.858 | 0.957 | 0.910 | 1.000 | 0.935 | 0.951 | 0.849 | 0.903 | 0.909 | 0.887 | 0.944 | 0.833 |
| 5  | 0.899 | 0.932 | 0.946 | 0.935 | 1.000 | 0.973 | 0.843 | 0.945 | 0.872 | 0.903 | 0.959 | 0.957 |
| 6  | 0.923 | 0.973 | 0.951 | 0.951 | 0.973 | 1.000 | 0.895 | 0.963 | 0.935 | 0.954 | 0.936 | 0.883 |
| 7  | 0.978 | 0.942 | 0.900 | 0.849 | 0.843 | 0.895 | 1.000 | 0.966 | 0.957 | 0.976 | 0.809 | 0.765 |
| 8  | 0.987 | 0.967 | 0.960 | 0.903 | 0.945 | 0.963 | 0.966 | 1.000 | 0.948 | 0.983 | 0.902 | 0.887 |
| 9  | 0.934 | 0.986 | 0.906 | 0.909 | 0.872 | 0.935 | 0.957 | 0.948 | 1.000 | 0.969 | 0.811 | 0.762 |
| 10 | 0.972 | 0.969 | 0.929 | 0.887 | 0.903 | 0.954 | 0.976 | 0.983 | 0.969 | 1.000 | 0.851 | 0.808 |
| 11 | 0.862 | 0.887 | 0.900 | 0.944 | 0.959 | 0.936 | 0.809 | 0.902 | 0.811 | 0.851 | 1.000 | 0.917 |
| 12 | 0.852 | 0.832 | 0.882 | 0.833 | 0.957 | 0.883 | 0.765 | 0.887 | 0.762 | 0.808 | 0.917 | 1.000 |
