# Supplementary material for: High-throughput and quantitative genome-wide messenger RNA sequencing for molecular phenotyping
Source: PubMed Central journal article supplement (PMC4524448; doi:10.1186/s12864-015-1788-6), 2015-08-05

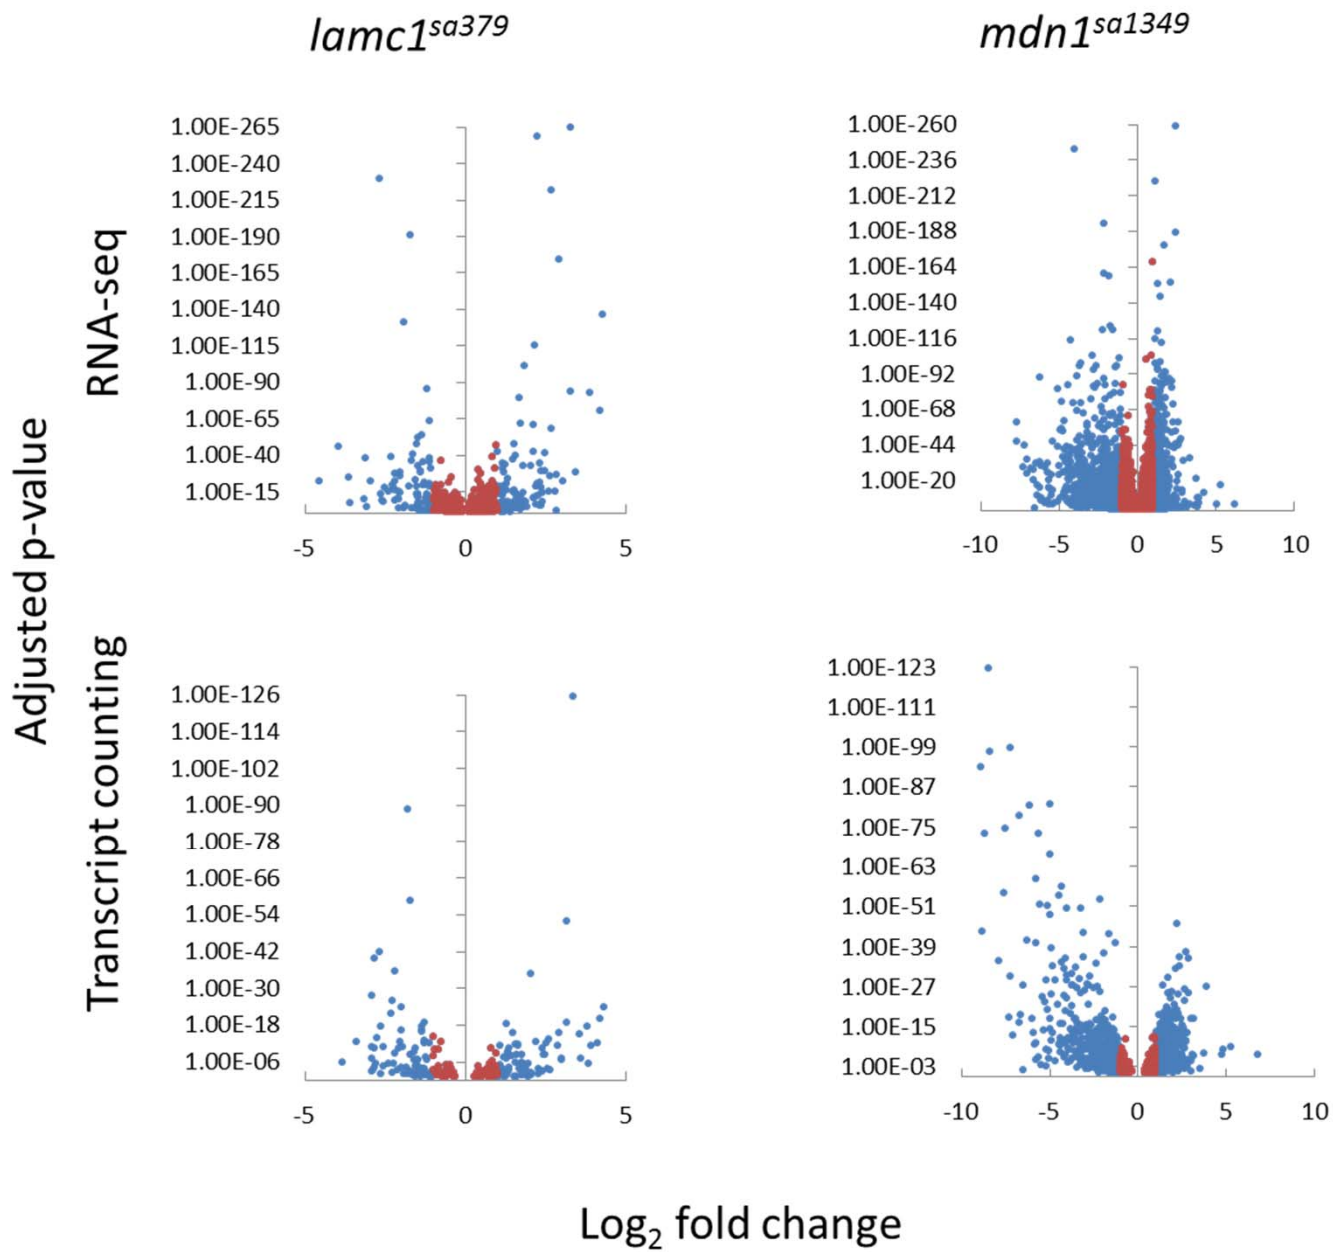

Supplement: 12864_2015_1788_MOESM6_ESM.pdf [file 12864_2015_1788_MOESM6_ESM.pdf]
