# Supplementary material for: High-throughput and quantitative genome-wide messenger RNA sequencing for molecular phenotyping
Source: PubMed Central journal article supplement (PMC4524448; doi:10.1186/s12864-015-1788-6), 2015-08-05
Supplement: 12864_2015_1788_MOESM7_ESM.pdf [file 12864_2015_1788_MOESM7_ESM.pdf]

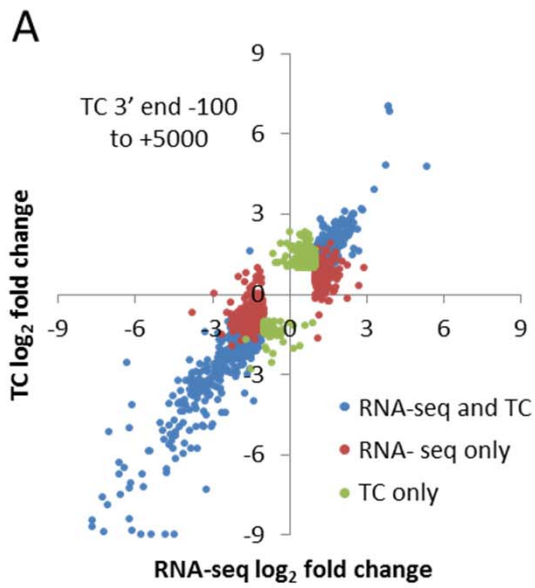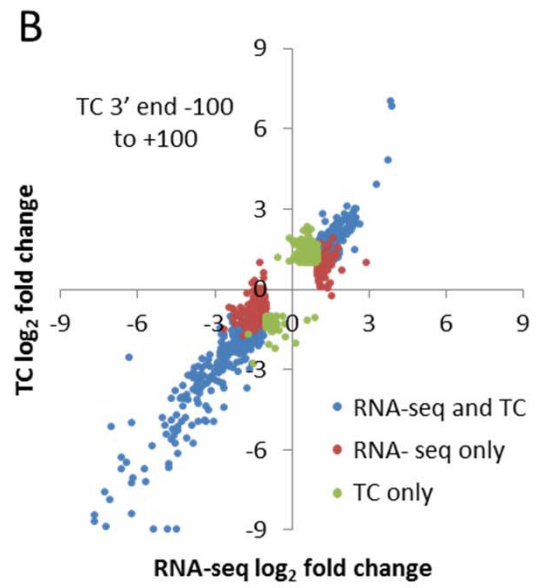

**C**

| Number of genes in DE in <i>mdn1<sup>sa1349</sup></i> | TC 3' end -100 to +5000 from ENST | TC 3' end -100 to +100 from ENST |
|-------------------------------------------------------|-----------------------------------|----------------------------------|
| Both                                                  | 961                               | 742                              |
| RNA-seq only                                          | 482                               | 289                              |
| TC only                                               | 466                               | 363                              |
| Total                                                 | 1982                              | 1394                             |
